# Supplementary material for: Experimental considerations to study Li-excess disordered rock salt cathode materials
Source: Royal Society of Chemistry journal article supplement (doi:10.1039/d0ta07836k), 2020-12-15
Supplement: d0ta07836k1.pdf [file d0ta07836k1.pdf]

## Experimental Considerations to Study Li-Excess Disordered Rock Salt Cathode Materials

Hyeseung Chung,<sup>a</sup> Zachary Lebens-Higgins,<sup>b</sup> Baharak Sayahpour,<sup>a</sup> Carlos Mejia,<sup>a</sup> Antonin Grenier,<sup>c</sup> Gabrielle E. Kamm,<sup>c</sup> Yixuan Li,<sup>a</sup> Ricky Huang,<sup>a</sup> Louis F.J. Piper,<sup>b</sup> Karena W. Chapman,<sup>c</sup> Jean-Marie Doux,<sup>\*a</sup> and Ying Shirley Meng<sup>\*a</sup>

<sup>a</sup> Department of Nanoengineering, University of California San Diego, La Jolla, California 92093, USA

<sup>b</sup> Department of Physics, Applied Physics and Astronomy, Binghamton University, Binghamton, New York 13902, USA

<sup>c</sup> Department of Chemistry, Stony Brook University, Stony Brook, New York 11794, USA

\* Correspondence to: shirleymeng@ucsd.edu, jdoux@ucsd.edu

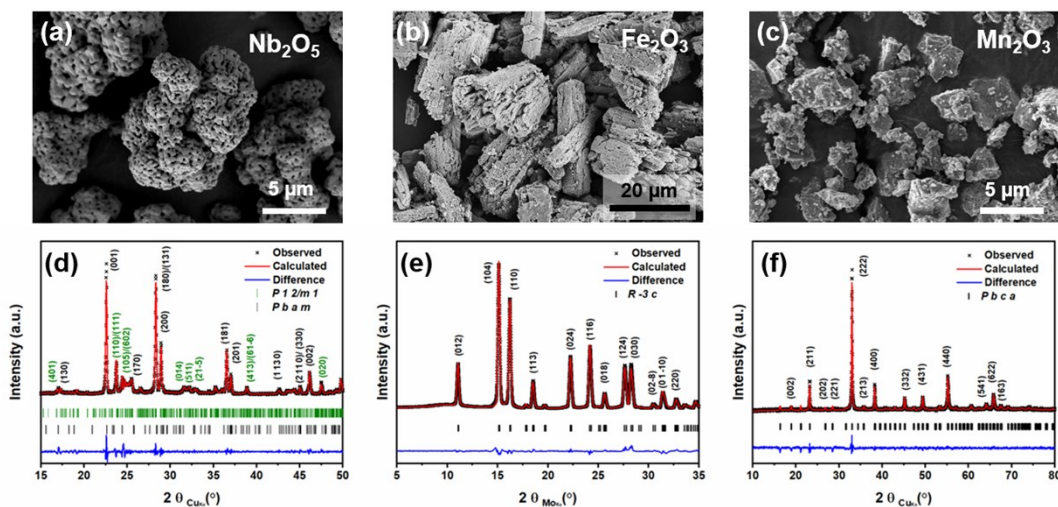

**Figure S1.** SEM images and XRD patterns of commercial micron-sized a, d) Nb<sub>2</sub>O<sub>5</sub>, b, e) Fe<sub>2</sub>O<sub>3</sub>, and c, f) Mn<sub>2</sub>O<sub>3</sub> precursors used for the solid-state synthesis.

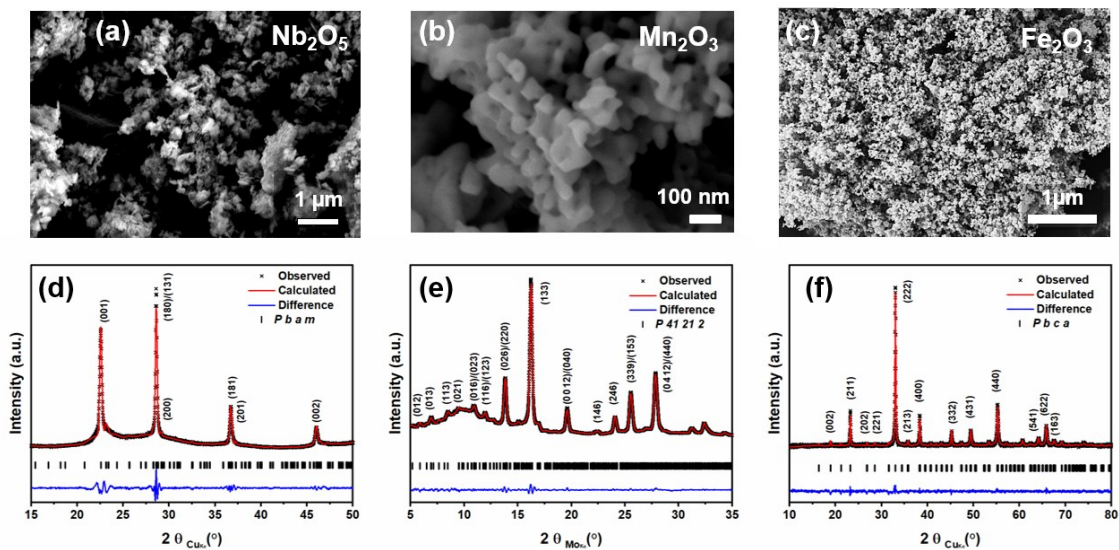

**Figure S2.** SEM images and XRD patterns of nano-sized a, d) Nb<sub>2</sub>O<sub>5</sub>, b, e) Mn<sub>2</sub>O<sub>3</sub>, and c, f) Fe<sub>2</sub>O<sub>3</sub> precursors used for the solid-state synthesis.

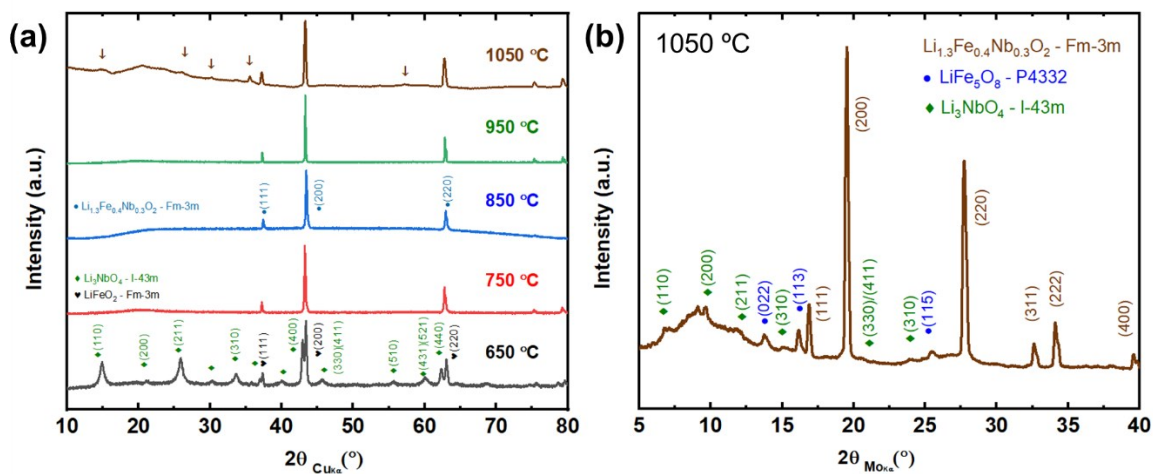

**Figure S3.** a) XRD pattern of Li<sub>1.3</sub>Fe<sub>0.4</sub>Nb<sub>0.3</sub>O<sub>2</sub> nano-sized precursor heated treated at different temperatures. Arrows mark decomposition species present in the 1050 °C heat-treated sample. b) Higher-resolution XRD of the same sample identifies the impurities to be LiFe<sub>5</sub>O<sub>8</sub> and Li<sub>3</sub>NbO<sub>4</sub>.

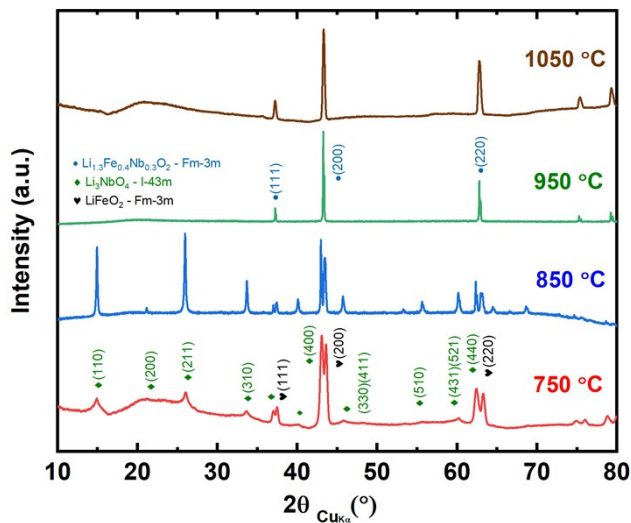

**Figure S4.** XRD pattern of  $\text{Li}_{1.3}\text{Fe}_{0.4}\text{Nb}_{0.3}\text{O}_2$  micro-sized precursor heated treated at different temperatures.

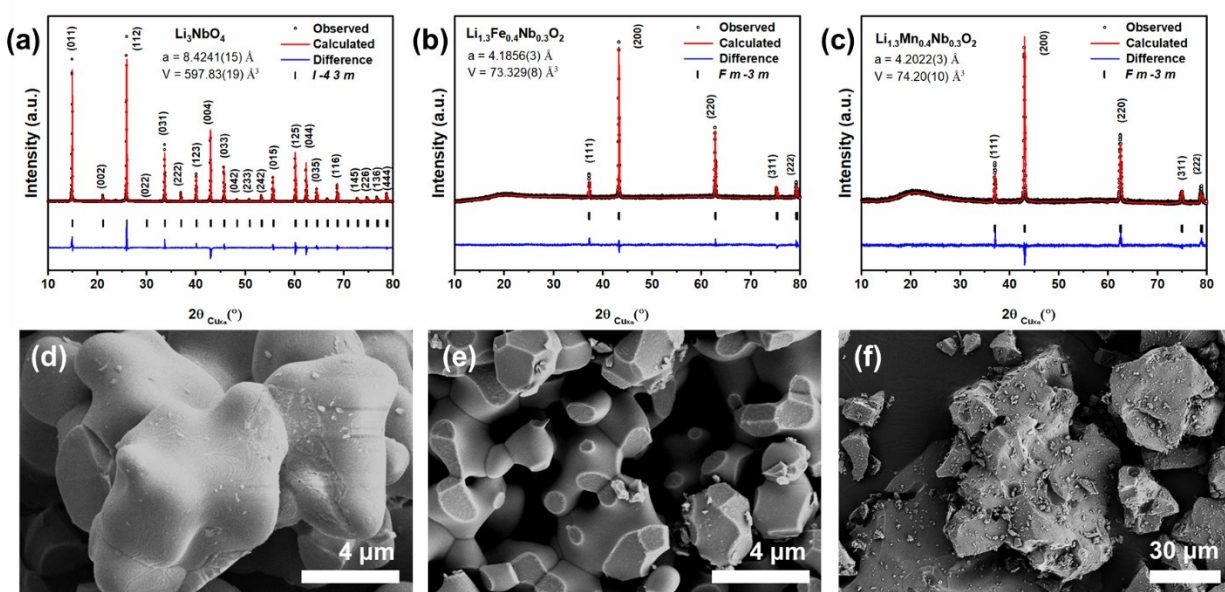

**Figure S5.** Rietveld refinements of the XRD patterns and SEM images of a, d)  $\text{Li}_3\text{NbO}_4$ , b, e)  $\text{Li}_{1.3}\text{Fe}_{0.4}\text{Nb}_{0.3}\text{O}_2$ , and c, f)  $\text{Li}_{1.3}\text{Mn}_{0.4}\text{Nb}_{0.3}\text{O}_2$  obtained by solid-state synthesis with commercial micron-sized precursors.

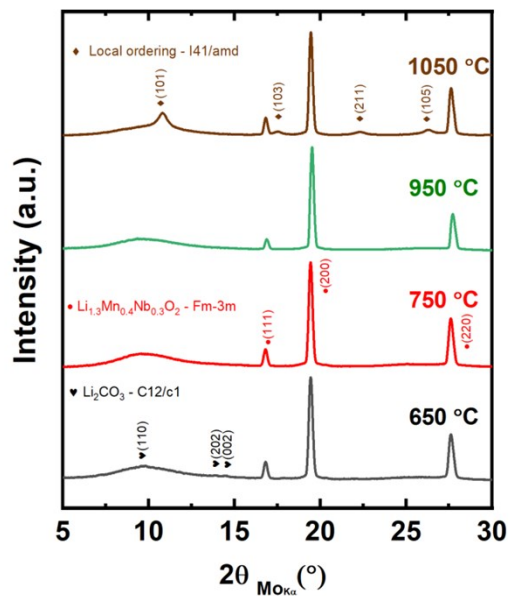

Figure S6. XRD pattern of  $\text{Li}_{1.3}\text{Mn}_{0.4}\text{Nb}_{0.3}\text{O}_2$  nano-sized precursor heated treated at different temperatures.

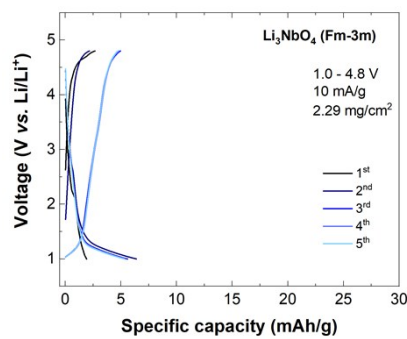

Figure S7. Voltage profile of disordered  $\text{Li}_3\text{NbO}_4$  nanoparticles.

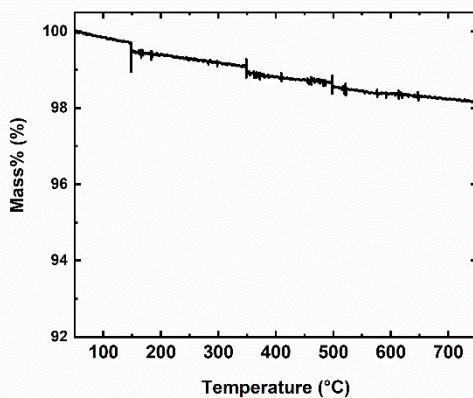

Figure S8. Thermogravimetric analysis of  $\text{Al}_2\text{O}_3$  reference.

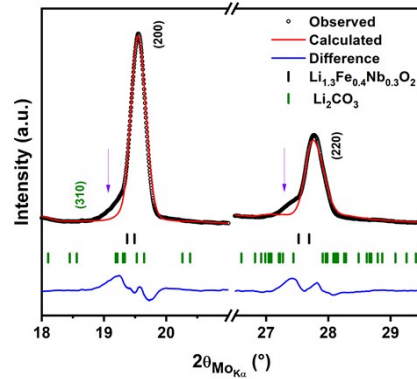

**Figure S9.** Selective theta range of profile matched XRD patterns of air-exposed nanosized  $\text{Li}_{1.3}\text{Fe}_{0.4}\text{Nb}_{0.3}\text{O}_2$  that highlights the widening at lower angle (marked by purple arrows)

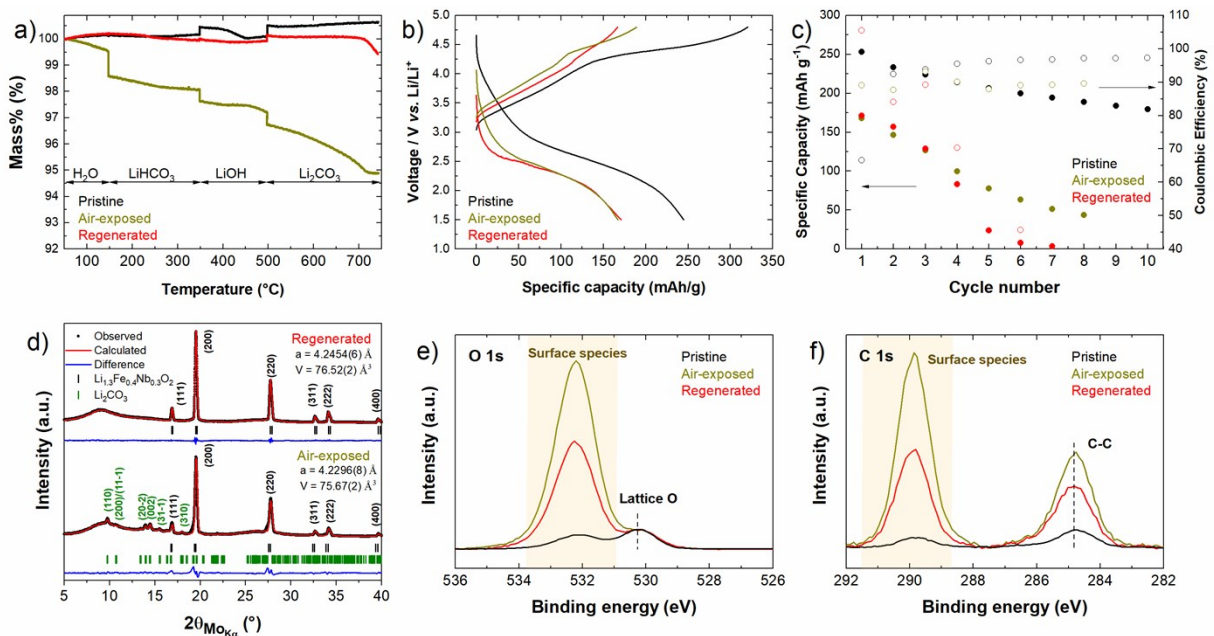

**Figure S10.** Study of the effect of surface contamination on the morphology-controlled sample of  $\text{Li}_{1.3}\text{Mn}_{0.4}\text{Nb}_{0.3}\text{O}_2$  in pristine state, after 4 weeks of air exposure, and after regeneration by heat treatment: a) Thermogravimetric analysis, b) First voltage profiles, c) Cycling stability, d) Profile matching refinement of the XRD patterns, and XPS measurements of the e) O 1s and f) C 1s core regions.

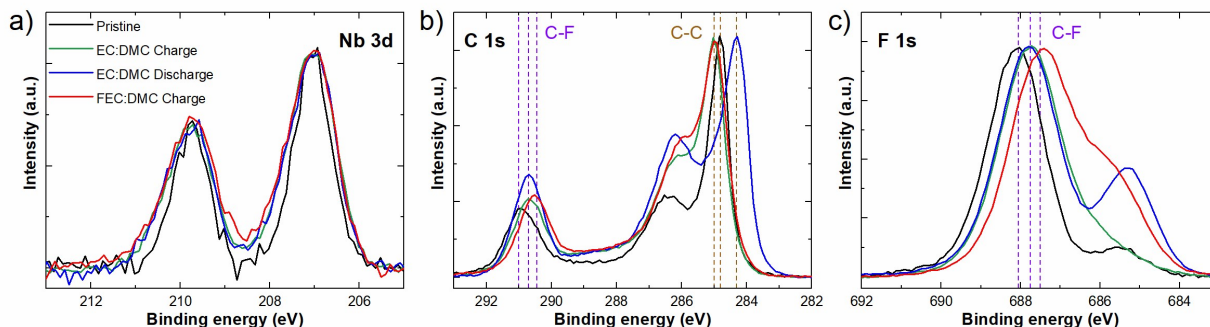

**Figure S11.** XPS spectra of the a) Nb 3d, b) C 1s, and c) F 1s regions of  $\text{Li}_{1.3}\text{Mn}_{0.4}\text{Nb}_{0.3}\text{O}_2$  in the pristine state, after first charge and discharge for EC:DMC (3:7) with 1M  $\text{LiPF}_6$  and after the first charge for FEC:DMC (1:4) with 1M  $\text{LiPF}_6$ .

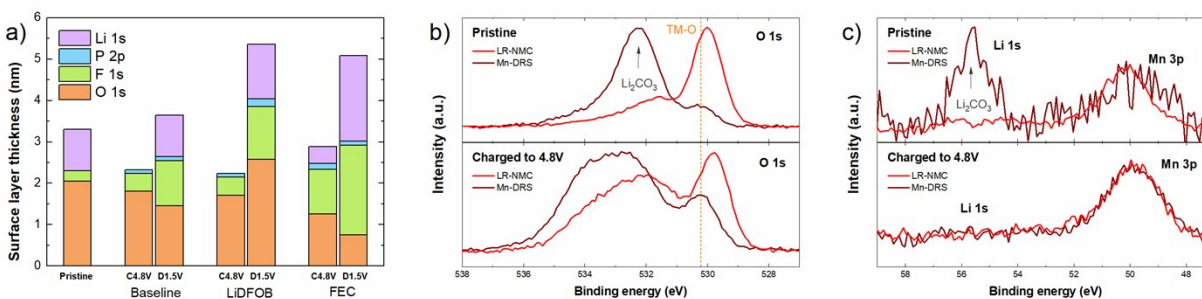

**Figure S12.** a) Surface layer thickness of Mn-DRS electrode in pristine, 4.8 V charged (C4.8V), and 1.5 V discharged (D1.5V) states with three electrolytes. Baseline corresponds to EC:DMC (3:7) with 1M  $\text{LiPF}_6$ , LiDFOB represents EC:DMC (3:7) with 1M  $\text{LiPF}_6$  + 2 % LiDFOB, and FEC represents FEC:DMC (1:4) with 1M  $\text{LiPF}_6$  electrolyte systems. Comparison of XPS spectra of the b) O 1s region and c) Li 1s and Mn 3p region of Mn-DRS and Li-rich NMC in the pristine state and after the first charge with EC:DMC (3:7) with 1M  $\text{LiPF}_6$ .

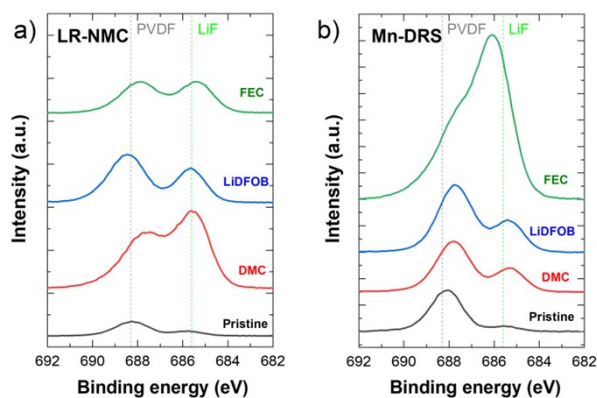

**Figure S13.** F 1s XPS spectra of a)  $\text{Li}[\text{Li}_{0.144}\text{Ni}_{0.136}\text{Co}_{0.136}\text{Mn}_{0.544}]\text{O}_2$  and b)  $\text{Li}_{1.3}\text{Mn}_{0.4}\text{Nb}_{0.3}\text{O}_2$  in the pristine state and after first discharge for the 3 electrolyte tested: EC:DMC (3:7) with 1M  $\text{LiPF}_6$ , EC:DMC (3:7) with 1M  $\text{LiPF}_6$  + 2 % LiDFOB, and FEC:DMC (1:4) with 1M  $\text{LiPF}_6$ .

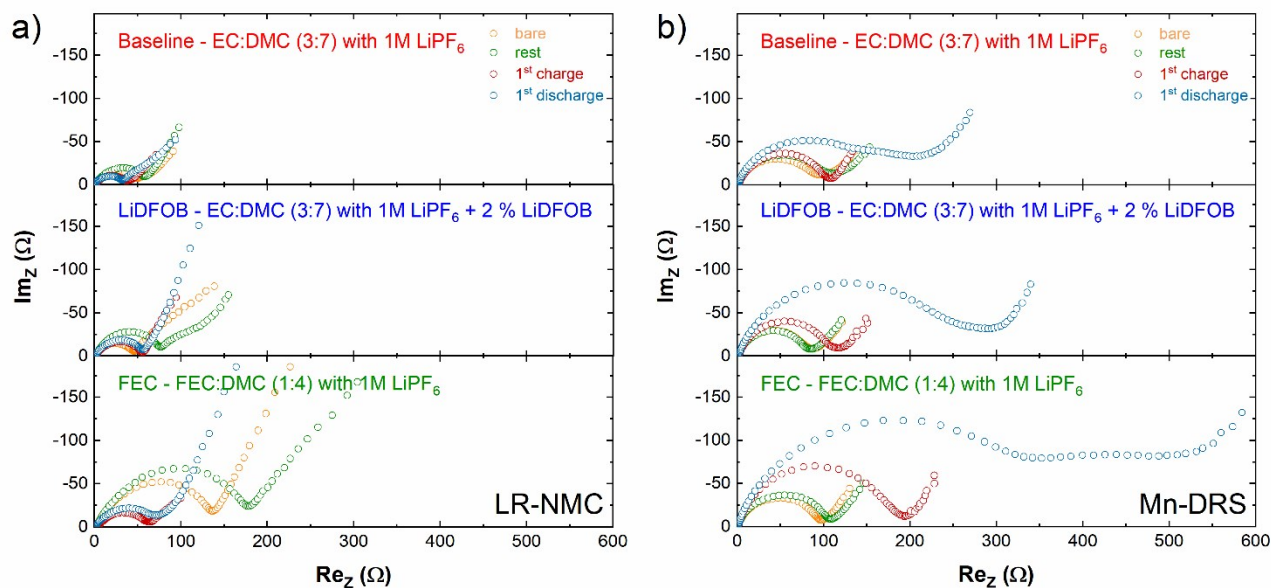

**Figure S14.** Nyquist plots of a)  $\text{Li}[\text{Li}_{0.144}\text{Ni}_{0.136}\text{Co}_{0.136}\text{Mn}_{0.544}]\text{O}_2$  and b)  $\text{Li}_{1.3}\text{Mn}_{0.4}\text{Nb}_{0.3}\text{O}_2$  cycled at room temperature with 3 different electrolytes. For each sample, the EIS spectra were acquired at 4 different steps: as assembled (bare), after 6 hours resting time (rest), after the 1<sup>st</sup> charge, and after the 1<sup>st</sup> discharge.

**Table S1.** Summary of XPS peak assignments.<sup>1-4</sup>

| Peak  | Binding energy (eV) | Assignment                      |
|-------|---------------------|---------------------------------|
| Li 1s | ≈ 55.6              | Li <sub>2</sub> CO <sub>3</sub> |
|       | ≈ 56.1              | LiF                             |
|       | ≈ 56.3              | Lattice Li                      |
|       | ≈ 57.53             | Li-P-F                          |
| P 2p  | ≈ 134.2             | P-O/P-O-F                       |
|       | ≈ 136.2             | Li-P-O-F                        |
|       | ≈ 137.3             | Li-P-F                          |
| O 1s  | ≈ 530.2             | Lattice O                       |
|       | ≈ 531.2             | -O-H                            |
|       | ≈ 532.3             | C=O/CO <sub>3</sub>             |
|       | ≈ 533.5             | C-O                             |
|       | ≈ 534.5             | P-O-F                           |
| F 1s  | ≈ 685.6             | LiF                             |
|       | ≈ 688.3             | PVDF                            |

**Table S2.** Coin cell testing specifications used for nanosized Li<sub>1.3</sub>TM<sub>0.4</sub>Nb<sub>0.3</sub>O<sub>2</sub> (TM = Fe, Mn).

| <b>Fe-/Mn-DRS Specification</b> |                                                                                                                                                     |
|---------------------------------|-----------------------------------------------------------------------------------------------------------------------------------------------------|
| Active material                 | Li <sub>1.3</sub> Fe <sub>0.4</sub> Nb <sub>0.3</sub> O <sub>2</sub> or Li <sub>1.3</sub> Mn <sub>0.4</sub> Nb <sub>0.3</sub> O <sub>2</sub> – 72 % |
| Conductive agent                | SPC65 – 18 %                                                                                                                                        |
| Binder                          | HSV900 – 10 %                                                                                                                                       |
| Counter electrode               | Li metal chip (Thickness: 1 mm, diameter: 15.4 mm)                                                                                                  |
| Separators                      | Celgard 2325                                                                                                                                        |
| Electrolyte type                | 1M LiPF <sub>6</sub> in EC:DMC = 3:7 vol. %                                                                                                         |
| Electrolyte amount              | 55 μl                                                                                                                                               |
| Cell type                       | CR2032                                                                                                                                              |
| Coin cell setup                 | 0.5 mm thick spacer and one spring at the anode side                                                                                                |
| Voltage range                   | 1.5 -4.8 V                                                                                                                                          |
| Test protocols                  | Rest for 6 h after assembling, then 20 mA g <sup>-1</sup> (equivalent to 0.75 - 0.89 mA cm <sup>-2</sup> ) for all cycles at room temperature       |
| Active material loading         | 3.7 - 4.4 mg cm <sup>-2</sup>                                                                                                                       |



**Table S3.** Coin cell testing specifications used in electrolyte compatibility study.

| <b>LR-NMC Specification</b> |                                                                                                                                                                                                                                          |
|-----------------------------|------------------------------------------------------------------------------------------------------------------------------------------------------------------------------------------------------------------------------------------|
| Active material             | Li[Li <sub>0.144</sub> Ni <sub>0.136</sub> Co <sub>0.136</sub> Mn <sub>0.544</sub> ]O <sub>2</sub> – 80 %                                                                                                                                |
| Conductive agent            | SPC65 – 10 %                                                                                                                                                                                                                             |
| Binder                      | HSV900 – 10 %                                                                                                                                                                                                                            |
| Counter electrode           | Li metal chip (Thickness: 1 mm, diameter: 15.4 mm)                                                                                                                                                                                       |
| Separators                  | Celgard 2325                                                                                                                                                                                                                             |
| Electrolyte type            | 1) Baseline: 1M LiPF <sub>6</sub> in EC:DMC = 3:7 vol. %<br>2) LiDFOB: 1M LiPF <sub>6</sub> in EC:DMC = 3:7 vol. % with 2 wt. % LiDFOB additive<br>3) FEC: 1M LiPF <sub>6</sub> in FEC:DMC = 1:4 vol. %                                  |
| Electrolyte amount          | 55 µl                                                                                                                                                                                                                                    |
| Cell type                   | CR2032                                                                                                                                                                                                                                   |
| Coin cell setup             | 0.5 mm thick spacer and one spring at the anode side                                                                                                                                                                                     |
| Voltage range               | 2.0 - 4.8 V                                                                                                                                                                                                                              |
| Test protocols              | Rest for 6 h after assembling, then 12.5 mA g <sup>-1</sup> (equivalent to 0.044 - 0.050 mA cm <sup>-2</sup> ) for first cycle, the rest at 25 mA g <sup>-1</sup> (equivalent to 0.088 - 0.100 mA cm <sup>-2</sup> ) at room temperature |
| Active material loading     | 3.5 - 4.0 mg cm <sup>-2</sup>                                                                                                                                                                                                            |
| <b>Mn-DRS Specification</b> |                                                                                                                                                                                                                                          |
| Active material             | Li <sub>1.3</sub> Mn <sub>0.4</sub> Nb <sub>0.3</sub> O <sub>2</sub> – 72 %                                                                                                                                                              |
| Conductive agent            | SPC65 – 18 %                                                                                                                                                                                                                             |
| Binder                      | HSV900 – 10 %                                                                                                                                                                                                                            |
| Counter electrode           | Li metal chip (Thickness: 1 mm, diameter: 15.4 mm)                                                                                                                                                                                       |
| Separators                  | Celgard 2325                                                                                                                                                                                                                             |
| Electrolyte type            | 1) Baseline: 1M LiPF <sub>6</sub> in EC:DMC = 3:7 vol. %<br>2) LiDFOB: 1M LiPF <sub>6</sub> in EC:DMC = 3:7 vol. % with 2 wt. % LiDFOB additive<br>3) FEC: 1M LiPF <sub>6</sub> in FEC:DMC = 1:4 vol. %                                  |
| Electrolyte amount          | 55 µl                                                                                                                                                                                                                                    |
| Cell type                   | CR2032                                                                                                                                                                                                                                   |
| Coin cell setup             | 0.5 mm thick spacer and one spring at the anode side                                                                                                                                                                                     |
| Voltage range               | 1.5 - 4.8 V                                                                                                                                                                                                                              |
| Test protocols              | Rest for 6 h after assembling, then 10 mA g <sup>-1</sup> (equivalent to 0.034 - 0.036 mA cm <sup>-2</sup> ) for all cycles at room temperature                                                                                          |
| Active material loading     | 3.4 - 3.6 mg cm <sup>-2</sup>                                                                                                                                                                                                            |

## Reference

- 1 Y. Lu, A. N. Mansour, N. Yabuuchi and Y. Shao-horn, *Chem. Mater.*, 2009, **21**, 4408–4424.
- 2 L. Baggetto, N. J. Dudney and G. M. Veith, *Electrochim. Acta*, 2013, **90**, 135–147.
- 3 Z. W. Lebens-Higgins, N. V. Faenza, M. D. Radin, H. Liu, S. Sallis, J. Rana, J. Vinckeviciute, P. J. Reeves, M. J. Zuba, F. Badway, N. Pereira, K. W. Chapman, T. L. Lee, T. Wu, C. P. Grey, B. C. Melot, A. Van Der Ven, G. G. Amatucci, W. Yang and L. F. J. Piper, *Mater. Horizons*, 2019, **6**, 2112–2123.
- 4 Q. Li, Y. Wang, X. Wang, X. Sun, J. N. Zhang, X. Yu and H. Li, *ACS Appl. Mater. Interfaces*, 2020, **12**, 2319–2326.
